# Supplementary material for: Highly Sensitive Paper-Based Force Sensors with Natural Micro-Nanostructure Sensitive Element
Source: MDPI journal article supplement (doi:10.3390/nano14040358), 2024-02-14
Supplement: s1 [file s1]

## Supplementary Materials

# Highly Sensitive Paper-Based Force Sensors with Natural Micro-Nanostructure Sensitive Element

Haozhe Zhang <sup>1,2,3</sup>, Yuyu Ren <sup>4</sup>, Junwen Zhu <sup>1,2,3</sup>, Yanshen Jia <sup>1,2,3</sup>, Qiang Liu <sup>1,2,3</sup> and Xing Yang <sup>1,2,3\*</sup>

<sup>1</sup> Department of Precision Instrument, Tsinghua University, Beijing 100084, China; zhanghz18@tsinghua.org.cn (H.Z.); zhujw21@mails.tsinghua.edu.cn (J.Z.); qiangliu@tsinghua.edu.cn (Q.L.); jys20@tsinghua.org.cn (Y.J.)

<sup>2</sup> Key Laboratory of Photonic Control Technology (Tsinghua University), Ministry of Education, Beijing 100084, China

<sup>3</sup> State Key Laboratory of Precision Space-time Information Sensing Technology, Beijing 100084, China

<sup>4</sup> School of Materials Science and Engineering, University of Science and Technology Beijing, Beijing 100083, China; 13519110246@163.com

\* Correspondence: yangxing@tsinghua.edu.cn

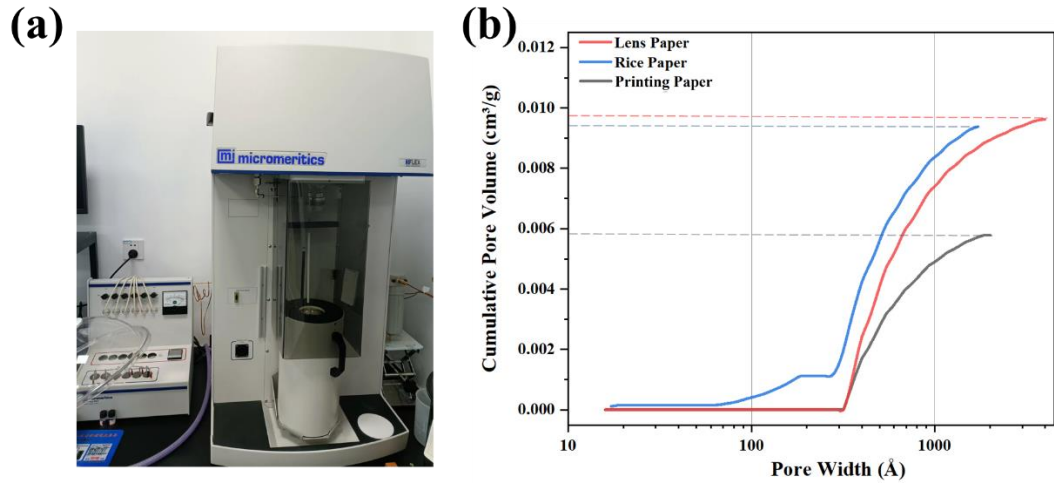

Figure S1. (a) BET experimental apparatus used for testing; (b) Comparison of cumulative pore volume for different paper materials.

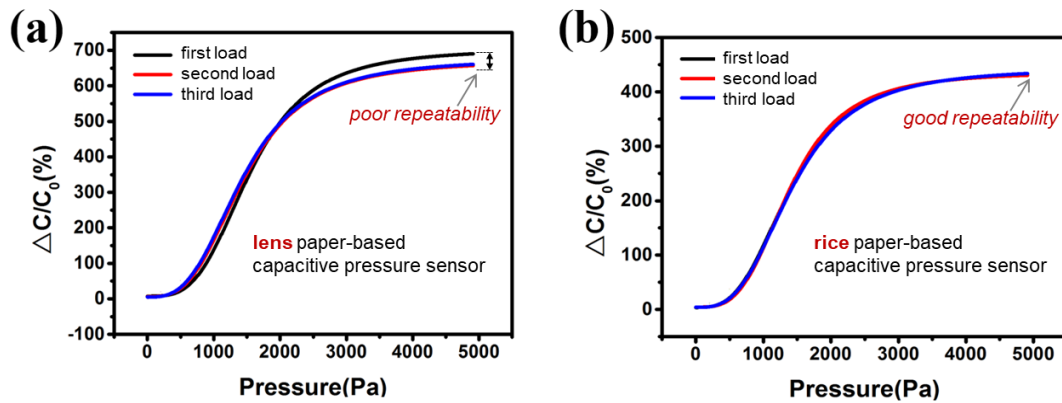

Figure S2. (a,b) The sensitivity curves of lens paper-based (left) and rice paper-based (right)

capacitive pressure sensors after multiple pressure loads.

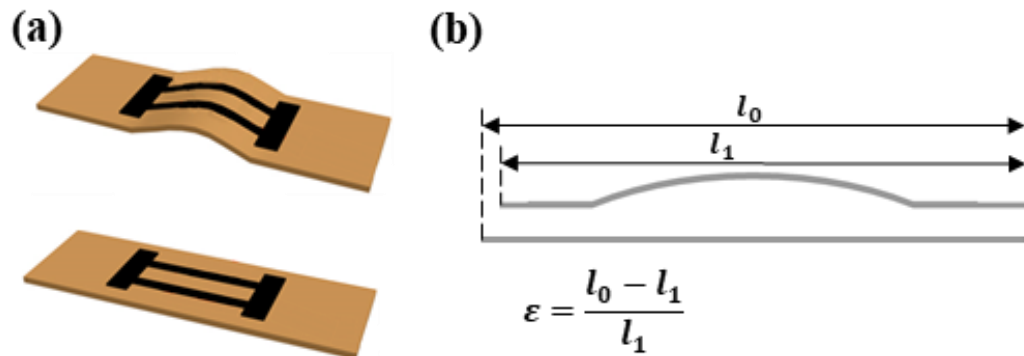

**Figure S3.** (a) Schematic diagrams of the resistive strain sensor under tension (above) and without tension (below); (b) Cross-sectional shape variation of the resistive strain sensor and the calculation formula for strain.

**Table S1.** Comparison with research of pressure sensors prepared with cellulosic materials

| Research        | Flexible substrate         | Sensitive element                   | Sensitivity (kPa <sup>-1</sup> ) | Response time (ms) |
|-----------------|----------------------------|-------------------------------------|----------------------------------|--------------------|
| Ref.33          | Bacterial cellulose        | MXene                               | 12.5                             | 167                |
| Ref.34          | CNC                        | CNT/Graphene                        | 0.25                             |                    |
| Ref.35          | Cotton balls               | Multiwalled carbon nanotube (MWCNT) | 0.0197                           | 20                 |
| Ref.36          | Cellulose microcrystalline | Polypyrrole                         | 58.9                             |                    |
| Ref.37          | TEMPO CNF                  | Silver nanoparticle                 | 9.5                              |                    |
| <b>Our work</b> | <b>Paper material</b>      | <b>Paper material</b>               | <b>1.623</b>                     | <b>240</b>         |

**Table S2.** Comparison with research of strain sensors prepared with cellulosic materials

| Research        | Flexible substrate      | Sensitive element                   | Sensitivity | Response time (ms) |
|-----------------|-------------------------|-------------------------------------|-------------|--------------------|
| Ref.38          | Bacterial cellulose     | Multiwalled carbon nanotube (MWCNT) | 21          | 390                |
| Ref.39          | Carboxymethyl cellulose | Na Fe <sup>3+</sup>                 | 4.02        | 260                |
| Ref.40          | Bacterial cellulose     | MWCNT Carbon black                  | 5.01        |                    |
| Ref.41          | CNF                     | Carbonized lignin                   |             |                    |
| <b>Our work</b> | <b>Paper material</b>   | <b>Paper material</b>               | <b>72</b>   | <b>300</b>         |
